# Supplementary material for: How does mode of travel affect risks posed to other road users? An analysis of English road fatality data, incorporating gender and road type
Source: PubMed Central journal article supplement (PMC7848050; doi:10.1136/injuryprev-2019-043534), 2020-04-06
Supplement: injuryprev-2019-043534supp001.pdf [file injuryprev-2019-043534supp001.pdf]

## Appendix

### 1. Poisson model details & formula

Here we present the model for road-collision fatalities and injuries to ORUs as a function of the specifics of the crash and this distance travelled by the road user. This is a standard Poisson log-linear regression model for contingency tables,

$$I_{m,r,c,s} \sim \text{Pois}(\lambda_{m,r,c,s});$$

$$\lambda_{m,r,c,s} = D_{m,r} \exp\left(\sum_{i=1}^n b_i x_i\right).$$

$$\sum_{i=1}^n b_i = b + b_m + b_r + b_c + b_s + b_{mr} + b_{mc} + b_{ms} + b_{rc} + b_{rs} + b_{mrc} + b_{mrs} + b_{rcs}$$

where  $I_{m,r,c,s}$  is the number of injuries observed in Stats19 from 2005-2015 in England for travel mode  $m$ , on road type  $r$ , with casualty mode  $c$ , and severity  $s$ . The corresponding expected number of injuries for this category is  $\lambda_{m,r,c,s}$ , which is a function of the corresponding distance  $D$  travelled by the road user  $m$  on road type  $r$ , and the expected number of injuries per km for the category  $m,r,c,s$ , which is a log-linear function of the coefficients  $b_i$ . These coefficients include an intercept term representing the expected number of injuries where all predictors take their baseline value, main effects  $b_m, b_r, b_c, b_s$  of each mode  $m$ , road type  $r$ , casualty mode  $c$  and severity  $s$ , all two-way interactions between these variables, and all three-way interactions, excluding the interaction between mode, casualty mode and severity. This was the most complex model that was computationally feasible to fit. The coefficients  $b_i$  are learnt via the `glm` function in R.

A second, similar model is fitted which also includes gender  $g$  as a predictor. Again, this includes all main effects, two-way and three-way interactions excluding the interaction between mode, casualty mode and severity.

Confidence intervals are obtained by simulating a large sample of values from the multivariate normal distribution defined by the estimates and covariance matrix of the  $b_i$ , transforming to a sample of values for the expected number of deaths per km for the group of interest, and determining the 90% quantiles of the sample.

### 2. Distance attribution

We attribute travel to road type by sequentially allocating a trip's distance first to minor urban (rural) roads, then urban (rural) major roads, then minor rural (urban) roads, then rural (urban) major roads, and the remainder to motorways, for an urban (rural) person. We learn the distance thresholds using a simple optimisation function to minimise the divergence between the RTS estimates and the NTS estimates scaled up to the whole population using ONS population estimates.

Any distance in excess of what is allocated to the first four road types is attributed to motorway, which is NA for bikes: any distance beyond the first three road types goes to the fourth road type.

Table 1: Apportionment of distance for different modes

|    |                                                         | Car        | Motorcycle | Van         | Bike      |
|----|---------------------------------------------------------|------------|------------|-------------|-----------|
| 1  | Taken on rural minor road by rural resident             | 8.21932511 | 9.15403824 | 11.24042916 | 18.0172   |
| 2  | Taken on rural major road by rural resident (after 1)   | 33.7572116 | 35.822129  | 37.19173417 | 10.0173   |
| 3  | Taken on urban minor road by rural resident (after 2)   | 1.56744496 | 5.90344252 | 1.164378324 | 8.00045   |
| 4  | Taken on urban major road by rural resident (after 3)   | 1.80821506 | 7.11639474 | 2.142441811 | Remaining |
| 5  | Taken on motorway by rural resident (after 4)           | Remaining  | Remaining  | Remaining   | None      |
| 6  | Taken on urban minor road by London resident            | 5.74588163 | 10.1791246 | 7.296514324 | 6.99975   |
| 7  | Taken on urban major road by London resident (after 6)  | 24.2647224 | 24.3081001 | 23.8185963  | 15.0001   |
| 8  | Taken on urban minor road by urban resident             | 5.20628762 | 10.3764801 | 7.918806022 | 4.6771    |
| 9  | Taken on urban major road by urban resident (after 8)   | 8.39420246 | 13.6636638 | 10.71601837 | 4.54894   |
| 10 | Taken on rural minor road by urban resident (after 7/9) | 2.16186477 | 7.76158421 | 3.754233787 | 14.9999   |
| 11 | Taken on rural major road by urban resident (after 10)  | 24.6250738 | 35.8507295 | 31.43879387 | Remaining |
| 12 | Taken on motorway by urban resident (after 11)          | Remaining  | Remaining  | Remaining   | None      |

### 3. Supplementary results

Headline results with multi-vehicle collisions excluded:

Table 2: Total ORU fatalities by road-user type as a percentage of all fatalities on the road type

|            | Rural A      | Urban A      | Rural Minor  | Urban Minor  | Total        |
|------------|--------------|--------------|--------------|--------------|--------------|
| Car/Taxi   | 2731 (66.2%) | 1646 (62.7%) | 1549 (74.3%) | 1658 (70.3%) | 7584 (67.7%) |
| Van        | 308 (7.5%)   | 176 (6.7%)   | 206 (9.9%)   | 214 (9.1%)   | 904 (8.1%)   |
| Lorry      | 900 (21.8%)  | 432 (16.5%)  | 202 (9.7%)   | 219 (9.3%)   | 1753 (15.7%) |
| Motorcycle | 68 (1.6%)    | 97 (3.7%)    | 47 (2.3%)    | 57 (2.4%)    | 269 (2.4%)   |
| Bus        | 115 (2.8%)   | 261 (9.9%)   | 69 (3.3%)    | 193 (8.2%)   | 638 (5.7%)   |
| Cycle      | 6 (0.1%)     | 14 (0.5%)    | 12 (0.6%)    | 18 (0.8%)    | 50 (0.4%)    |
| Total      | 4128         | 2626         | 2085         | 2359         | 11198        |

Note that were we to exclude multi-vehicle collisions (as in other literature) while the overall picture stays the same, motorised modes but not cycles look proportionally safer.

Figure 1: comparison of ORU fatality rates if multi-party collisions were excluded, with our main findings
