# Supplementary material for: How does mode of travel affect risks posed to other road users? An analysis of English road fatality data, incorporating gender and road type
Source: PubMed Central journal article supplement (PMC7848050; doi:10.1136/injuryprev-2019-043534), 2020-04-06

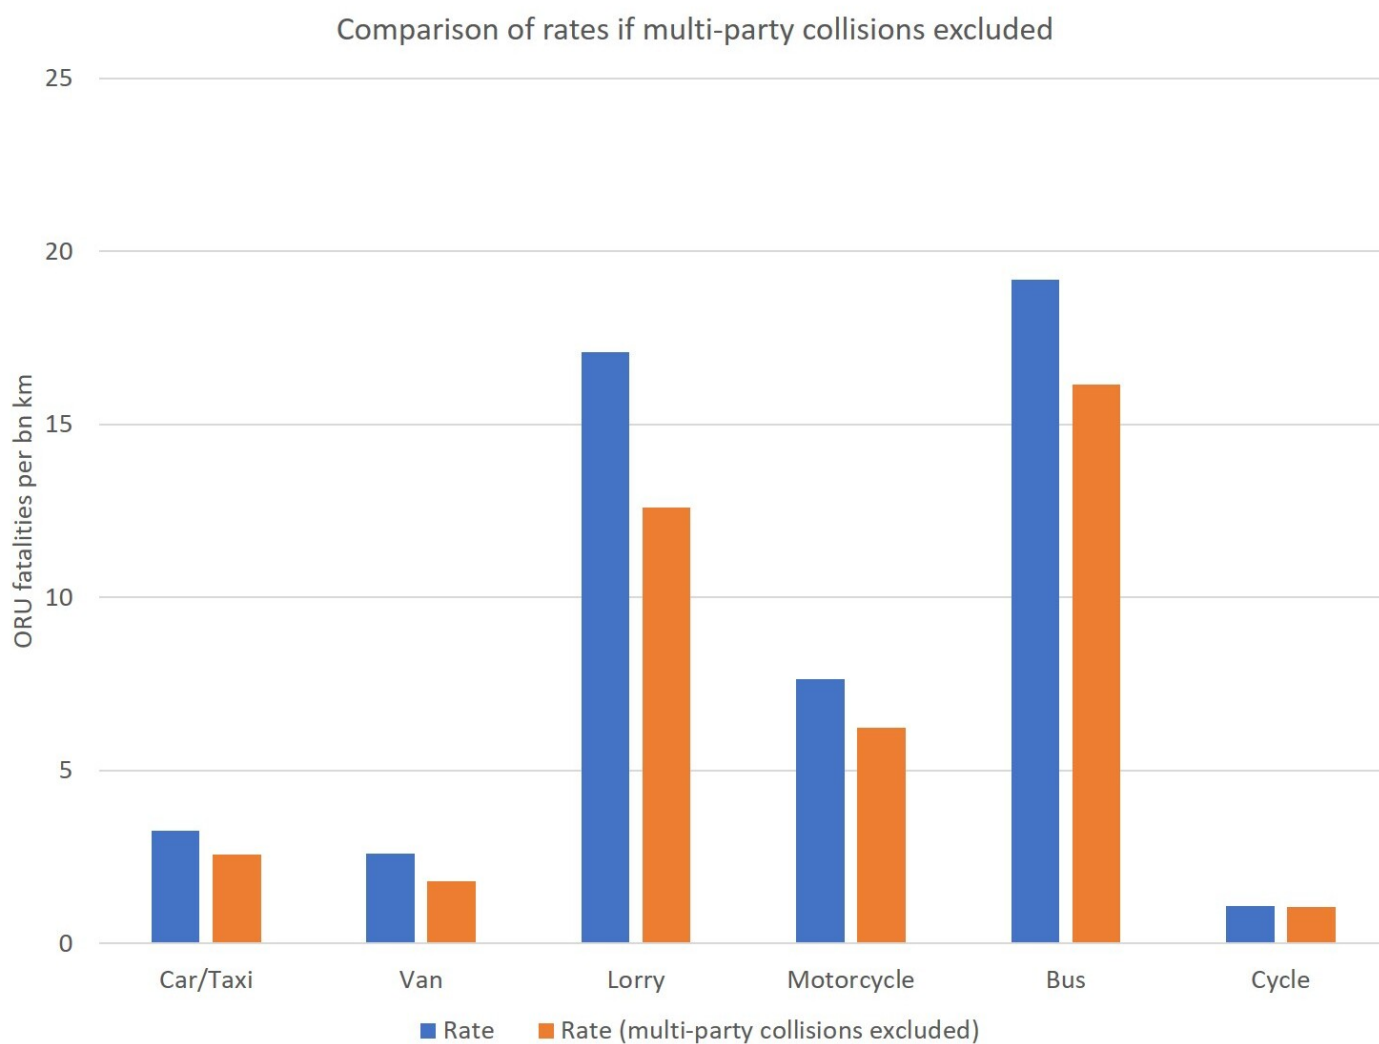

Supplement: injuryprev-2019-043534supp002.pdf [file injuryprev-2019-043534supp002.pdf]
